# Supplementary material for: Identification of potential novel biomarkers to differentiate malignant thyroid nodules with cytological indeterminate
Source: PubMed Central journal article supplement (PMC7066786; doi:10.1186/s12885-020-6676-z), 2020-03-12
Supplement: 12885_2020_6676_MOESM1_ESM.pdf [file 12885_2020_6676_MOESM1_ESM.pdf]

Sample dendrogram and Clinic Feature trait heatmap

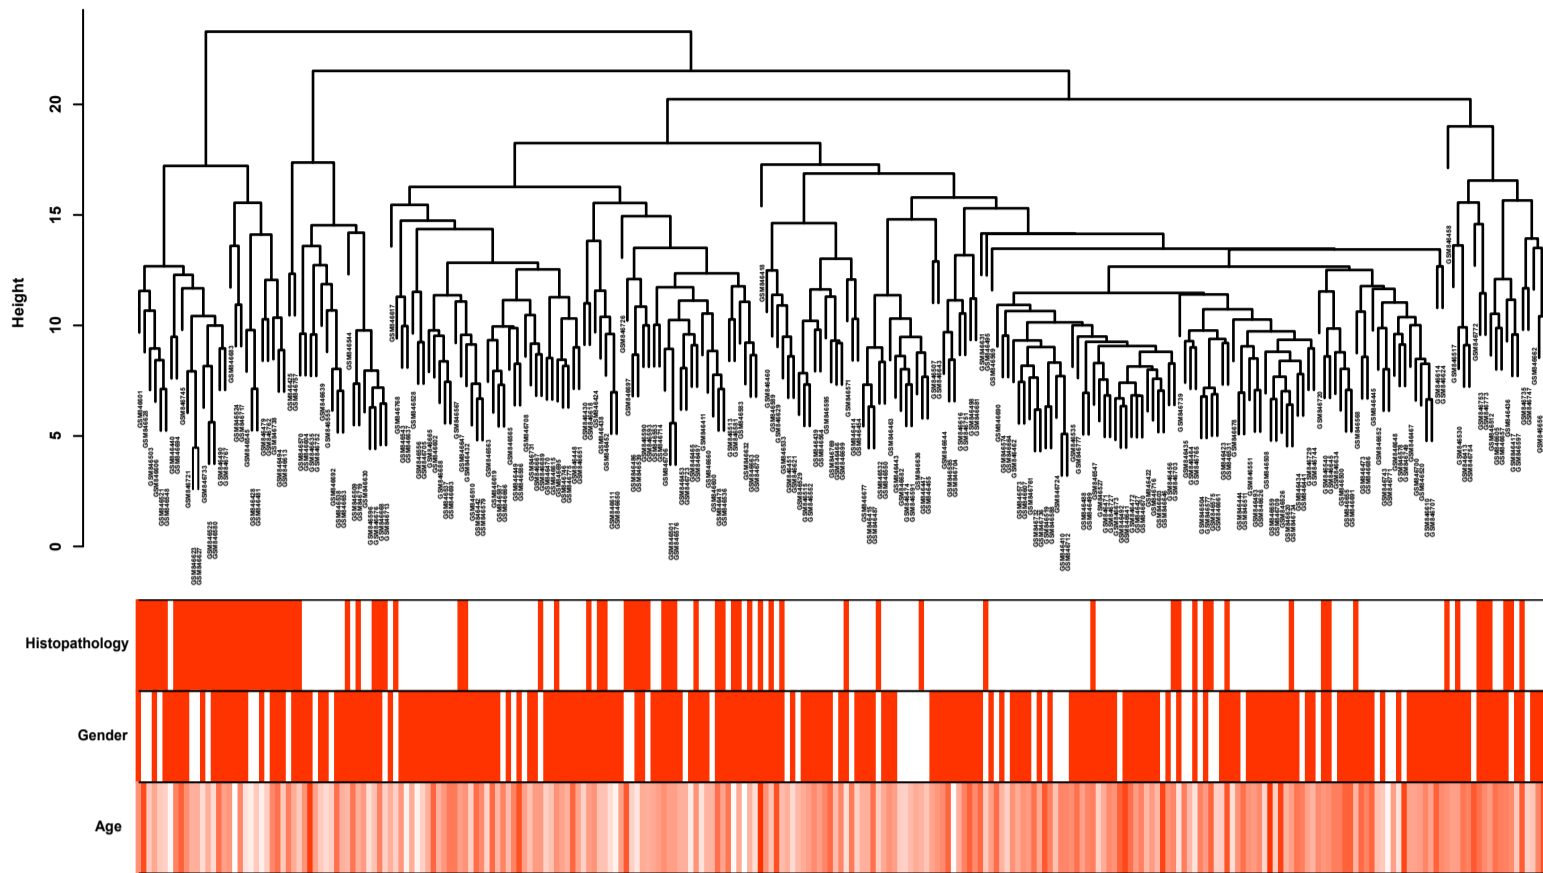

**Supporting Figure 1.** Sample dendrogram and clinic feature traits heatmap. Clustering dendrogram of samples based on their euclidean distance. The clinical feature traits were histopathology, gender and age. The white color means a low value, red means a high value, and grey represents a missing entry.
