# Supplementary material for: Identification of potential novel biomarkers to differentiate malignant thyroid nodules with cytological indeterminate
Source: PubMed Central journal article supplement (PMC7066786; doi:10.1186/s12885-020-6676-z), 2020-03-12
Supplement: 12885_2020_6676_MOESM2_ESM.pdf [file 12885_2020_6676_MOESM2_ESM.pdf]

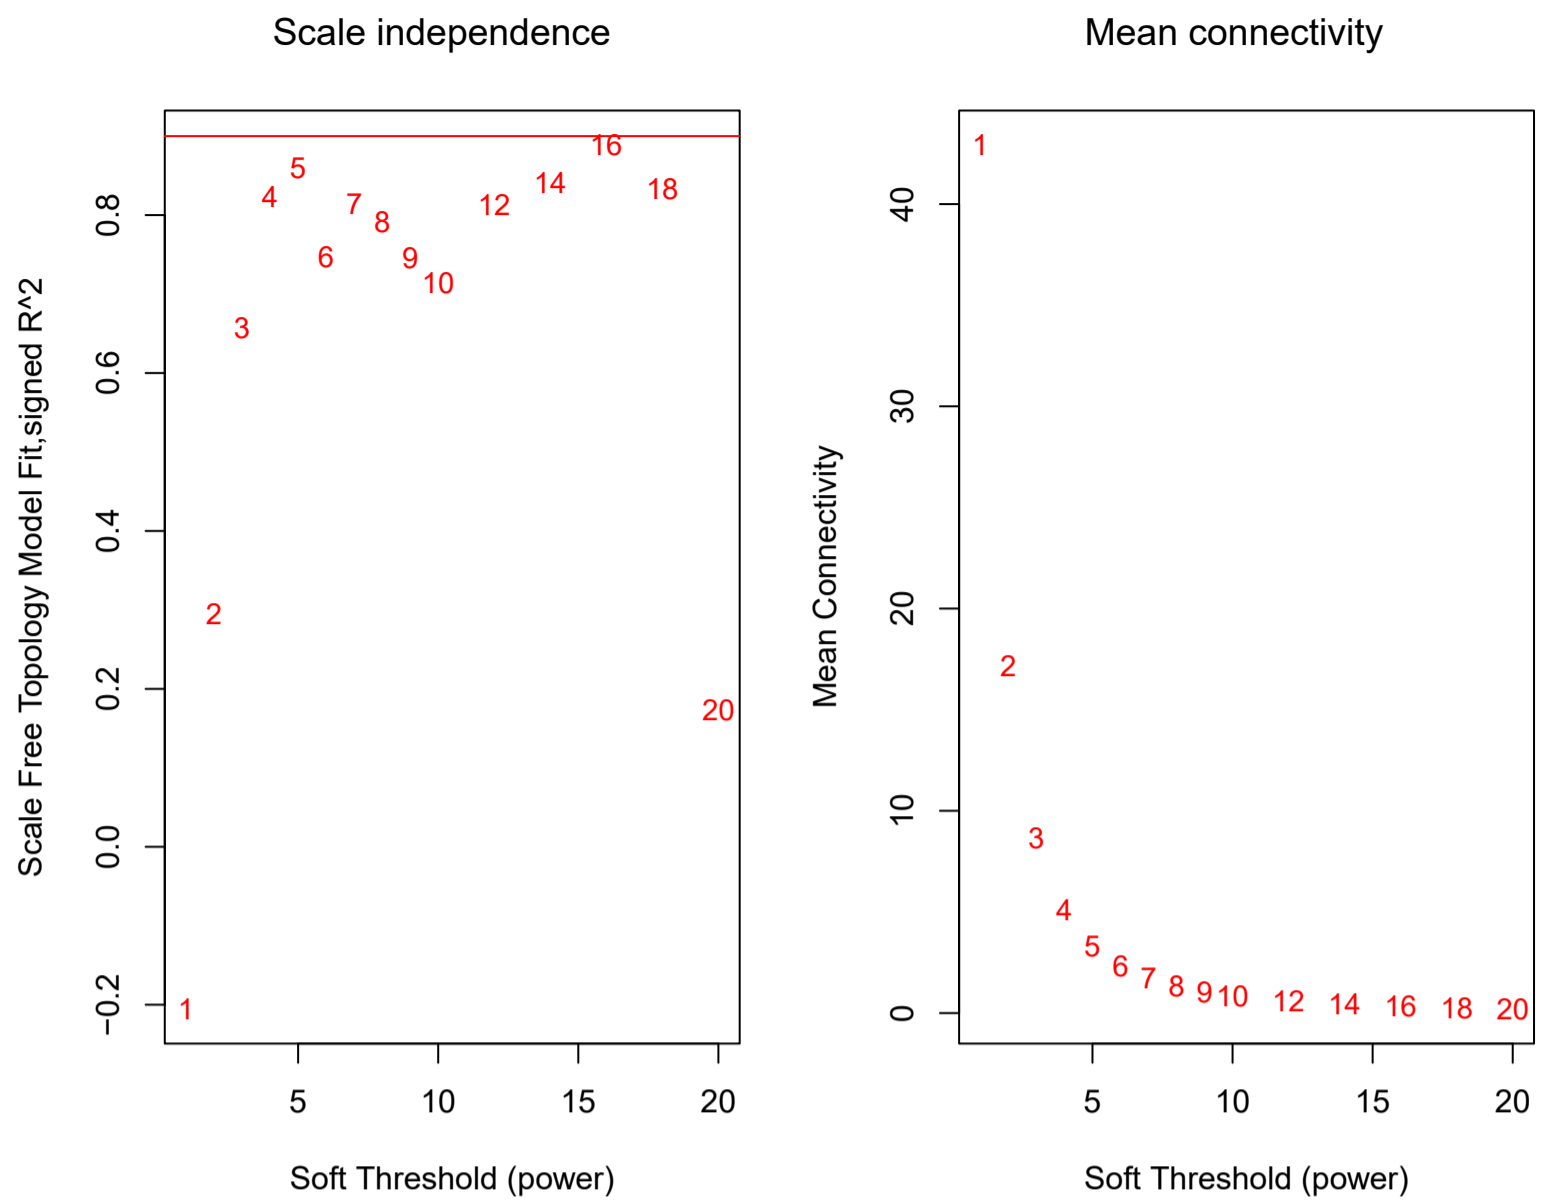

**Supporting Figure 2.** Analysis of network topology for various soft-thresholding powers. In Panel (A), the scale-free topology model fit index (Signed R<sup>2</sup>, y-axis) shows as a function of the soft-thresholding power (x-axis). In Panel (B), the mean connectivity ( $k_i$ , y-axis) displays as a function of the soft-thresholding power (x-axis) under different weighting coefficients. The connectivity  $k_i$  of node  $i$  equals the number of its direct connections to other nodes.  $P(k)$  indicates the frequency distribution of the connectivity. The higher the coefficient, the closer the network is to the distribution of the scale free network.
