# Supplementary material for: Identification of potential novel biomarkers to differentiate malignant thyroid nodules with cytological indeterminate
Source: PubMed Central journal article supplement (PMC7066786; doi:10.1186/s12885-020-6676-z), 2020-03-12
Supplement: 12885_2020_6676_MOESM7_ESM.pdf [file 12885_2020_6676_MOESM7_ESM.pdf]

**Supporting Table.1 Samples information of different case groups.**

| Case groups | Sample ID | Cytology      | Histopathology | Age (yrs) |
|-------------|-----------|---------------|----------------|-----------|
|             | GSM846410 | indeterminate | benign         | 59        |
|             | GSM846411 | indeterminate | benign         | 31        |
|             | GSM846413 | indeterminate | benign         | 64        |
|             | GSM846414 | indeterminate | benign         | 63        |
|             | GSM846415 | indeterminate | benign         | 47        |
|             | GSM846422 | indeterminate | benign         | 44        |
|             | GSM846423 | indeterminate | benign         | 38        |
|             | GSM846424 | indeterminate | benign         | 55        |
|             | GSM846427 | indeterminate | benign         | 53        |
|             | GSM846430 | indeterminate | benign         | 36        |
|             | GSM846434 | indeterminate | benign         | 64        |
|             | GSM846435 | indeterminate | benign         | 62        |
|             | GSM846439 | indeterminate | benign         | 58        |
|             | GSM846440 | indeterminate | benign         | 25        |
|             | GSM846441 | indeterminate | benign         | 62        |
|             | GSM846442 | indeterminate | benign         | 67        |
|             | GSM846443 | indeterminate | benign         | 51        |
|             | GSM846444 | indeterminate | benign         | 56        |
|             | GSM846445 | indeterminate | benign         | 69        |
|             | GSM846448 | indeterminate | benign         | 69        |
|             | GSM846449 | indeterminate | benign         | 60        |
|             | GSM846451 | indeterminate | benign         | 47        |
|             | GSM846453 | indeterminate | benign         | 46        |
|             | GSM846454 | indeterminate | benign         | 37        |
|             | GSM846455 | indeterminate | benign         | 40        |
|             | GSM846456 | indeterminate | benign         | 55        |
|             | GSM846460 | indeterminate | benign         | 55        |
|             | GSM846462 | indeterminate | benign         | 55        |
|             | GSM846463 | indeterminate | benign         | 56        |
|             | GSM846464 | indeterminate | benign         | 44        |
|             | GSM846465 | indeterminate | benign         | 29        |
|             | GSM846466 | indeterminate | benign         | 43        |
|             | GSM846467 | indeterminate | benign         | 50        |
|             | GSM846470 | indeterminate | benign         | 36        |
|             | GSM846471 | indeterminate | benign         | 48        |
|             | GSM846472 | indeterminate | benign         | 66        |
|             | GSM846473 | indeterminate | benign         | 68        |
|             | GSM846474 | indeterminate | benign         | 37        |
|             | GSM846487 | indeterminate | benign         | 66        |
|             | GSM846488 | indeterminate | benign         | 51        |
|             | GSM846492 | indeterminate | benign         | 70        |
|             | GSM846493 | indeterminate | benign         | 53        |
|             | GSM846498 | indeterminate | benign         | 70        |
|             | GSM846499 | indeterminate | benign         | 59        |
|             | GSM846500 | indeterminate | benign         | 62        |
|             | GSM846504 | indeterminate | benign         | 61        |
|             | GSM846507 | indeterminate | benign         | 50        |

|           |               |        |    |
|-----------|---------------|--------|----|
| GSM846508 | indeterminate | benign | 35 |
| GSM846509 | indeterminate | benign | 64 |
| GSM846510 | indeterminate | benign | 37 |
| GSM846511 | indeterminate | benign | 66 |
| GSM846513 | indeterminate | benign | 64 |
| GSM846515 | indeterminate | benign | 48 |
| GSM846517 | indeterminate | benign | 52 |
| GSM846519 | indeterminate | benign | 73 |
| GSM846520 | indeterminate | benign | 52 |
| GSM846526 | indeterminate | benign | 81 |
| GSM846527 | indeterminate | benign | 37 |
| GSM846528 | indeterminate | benign | 48 |
| GSM846529 | indeterminate | benign | 44 |
| GSM846535 | indeterminate | benign | 57 |
| GSM846537 | indeterminate | benign | 54 |
| GSM846538 | indeterminate | benign | 65 |
| GSM846543 | indeterminate | benign | 54 |
| GSM846550 | indeterminate | benign | 49 |
| GSM846551 | indeterminate | benign | 56 |
| GSM846552 | indeterminate | benign | 52 |
| GSM846553 | indeterminate | benign | 49 |
| GSM846555 | indeterminate | benign | 34 |
| GSM846556 | indeterminate | benign | 26 |
| GSM846563 | indeterminate | benign | 35 |
| GSM846564 | indeterminate | benign | 51 |
| GSM846565 | indeterminate | benign | 43 |
| GSM846567 | indeterminate | benign | 63 |
| GSM846569 | indeterminate | benign | 52 |
| GSM846573 | indeterminate | benign | 48 |
| GSM846574 | indeterminate | benign | 45 |
| GSM846578 | indeterminate | benign | 31 |
| GSM846579 | indeterminate | benign | 58 |
| GSM846585 | indeterminate | benign | 69 |
| GSM846586 | indeterminate | benign | 75 |
| GSM846587 | indeterminate | benign | 44 |
| GSM846588 | indeterminate | benign | 60 |
| GSM846591 | indeterminate | benign | 43 |
| GSM846595 | indeterminate | benign | 59 |
| GSM846596 | indeterminate | benign | 33 |
| GSM846597 | indeterminate | benign | 39 |
| GSM846600 | indeterminate | benign | 45 |
| GSM846602 | indeterminate | benign | 69 |
| GSM846603 | indeterminate | benign | 44 |
| GSM846604 | indeterminate | benign | 56 |
| GSM846605 | indeterminate | benign | 65 |
| GSM846607 | indeterminate | benign | 56 |
| GSM846610 | indeterminate | benign | 59 |
| GSM846611 | indeterminate | benign | 33 |
| GSM846614 | indeterminate | benign | 71 |
| GSM846615 | indeterminate | benign | 41 |
| GSM846616 | indeterminate | benign | 47 |

|     |           |               |        |    |
|-----|-----------|---------------|--------|----|
|     | GSM846617 | indeterminate | benign | 46 |
|     | GSM846619 | indeterminate | benign | 68 |
|     | GSM846620 | indeterminate | benign | 45 |
|     | GSM846621 | indeterminate | benign | 34 |
|     | GSM846624 | indeterminate | benign | 58 |
|     | GSM846626 | indeterminate | benign | 58 |
|     | GSM846629 | indeterminate | benign | 75 |
|     | GSM846630 | indeterminate | benign | 53 |
|     | GSM846631 | indeterminate | benign | 68 |
|     | GSM846632 | indeterminate | benign | 22 |
|     | GSM846634 | indeterminate | benign | 62 |
|     | GSM846635 | indeterminate | benign | 82 |
|     | GSM846636 | indeterminate | benign | 48 |
|     | GSM846637 | indeterminate | benign | 26 |
|     | GSM846639 | indeterminate | benign | 39 |
|     | GSM846641 | indeterminate | benign | 78 |
|     | GSM846643 | indeterminate | benign | 54 |
|     | GSM846644 | indeterminate | benign | 58 |
|     | GSM846646 | indeterminate | benign | 79 |
|     | GSM846648 | indeterminate | benign | 52 |
|     | GSM846650 | indeterminate | benign | 26 |
|     | GSM846651 | indeterminate | benign | 50 |
|     | GSM846652 | indeterminate | benign | 42 |
|     | GSM846653 | indeterminate | benign | 46 |
|     | GSM846655 | indeterminate | benign | 71 |
|     | GSM846656 | indeterminate | benign | 59 |
|     | GSM846657 | indeterminate | benign | 62 |
|     | GSM846659 | indeterminate | benign | 84 |
|     | GSM846660 | indeterminate | benign | 45 |
|     | GSM846661 | indeterminate | benign | 37 |
|     | GSM846662 | indeterminate | benign | 40 |
|     | GSM846664 | indeterminate | benign | 37 |
|     | GSM846665 | indeterminate | benign | 46 |
| One | GSM846666 | indeterminate | benign | 61 |
|     | GSM846667 | indeterminate | benign | 53 |
|     | GSM846670 | indeterminate | benign | 60 |
|     | GSM846673 | indeterminate | benign | 56 |
|     | GSM846677 | indeterminate | benign | 46 |
|     | GSM846678 | indeterminate | benign | 33 |
|     | GSM846681 | indeterminate | benign | 58 |
|     | GSM846682 | indeterminate | benign | 38 |
|     | GSM846686 | indeterminate | benign | 61 |
|     | GSM846688 | indeterminate | benign | 47 |
|     | GSM846690 | indeterminate | benign | 67 |
|     | GSM846691 | indeterminate | benign | 71 |
|     | GSM846692 | indeterminate | benign | 38 |
|     | GSM846693 | indeterminate | benign | 63 |
|     | GSM846699 | indeterminate | benign | 59 |
|     | GSM846700 | indeterminate | benign | 50 |
|     | GSM846704 | indeterminate | benign | 24 |
|     | GSM846705 | indeterminate | benign | 37 |

|           |               |           |    |
|-----------|---------------|-----------|----|
| GSM846707 | indeterminate | benign    | 50 |
| GSM846708 | indeterminate | benign    | 51 |
| GSM846709 | indeterminate | benign    | 38 |
| GSM846712 | indeterminate | benign    | 59 |
| GSM846714 | indeterminate | benign    | 52 |
| GSM846715 | indeterminate | benign    | 76 |
| GSM846716 | indeterminate | benign    | 53 |
| GSM846720 | indeterminate | benign    | 58 |
| GSM846723 | indeterminate | benign    | 47 |
| GSM846724 | indeterminate | benign    | 42 |
| GSM846726 | indeterminate | benign    | 51 |
| GSM846727 | indeterminate | benign    | 58 |
| GSM846729 | indeterminate | benign    | 50 |
| GSM846730 | indeterminate | benign    | 33 |
| GSM846731 | indeterminate | benign    | 41 |
| GSM846732 | indeterminate | benign    | 65 |
| GSM846736 | indeterminate | benign    | 49 |
| GSM846743 | indeterminate | benign    | 39 |
| GSM846744 | indeterminate | benign    | 45 |
| GSM846746 | indeterminate | benign    | 50 |
| GSM846747 | indeterminate | benign    | 37 |
| GSM846749 | indeterminate | benign    | 79 |
| GSM846751 | indeterminate | benign    | 61 |
| GSM846752 | indeterminate | benign    | 50 |
| GSM846754 | indeterminate | benign    | 60 |
| GSM846761 | indeterminate | benign    | 53 |
| GSM846769 | indeterminate | benign    | 68 |
| GSM846771 | indeterminate | benign    | 25 |
| GSM846772 | indeterminate | benign    | 73 |
| GSM846775 | indeterminate | benign    | 46 |
| GSM846777 | indeterminate | benign    | 65 |
| GSM846417 | indeterminate | malignant | 58 |
| GSM846418 | indeterminate | malignant | 85 |
| GSM846425 | indeterminate | malignant | 62 |
| GSM846428 | indeterminate | malignant | 28 |
| GSM846432 | indeterminate | malignant | 56 |
| GSM846436 | indeterminate | malignant | 61 |
| GSM846438 | indeterminate | malignant | 42 |
| GSM846447 | indeterminate | malignant | 45 |
| GSM846452 | indeterminate | malignant | 41 |
| GSM846458 | indeterminate | malignant | 55 |
| GSM846478 | indeterminate | malignant | 66 |
| GSM846479 | indeterminate | malignant | 28 |
| GSM846481 | indeterminate | malignant | 39 |
| GSM846486 | indeterminate | malignant | 37 |
| GSM846490 | indeterminate | malignant | 66 |
| GSM846494 | indeterminate | malignant | 65 |
| GSM846495 | indeterminate | malignant | 39 |
| GSM846497 | indeterminate | malignant | 55 |
| GSM846501 | indeterminate | malignant | 51 |
| GSM846503 | indeterminate | malignant | 39 |

|     |           |               |           |    |
|-----|-----------|---------------|-----------|----|
|     | GSM846512 | indeterminate | malignant | 53 |
|     | GSM846521 | indeterminate | malignant | 39 |
|     | GSM846524 | indeterminate | malignant | 23 |
|     | GSM846525 | indeterminate | malignant | 46 |
|     | GSM846530 | indeterminate | malignant | 51 |
|     | GSM846531 | indeterminate | malignant | 74 |
| Two | GSM846532 | indeterminate | malignant | 38 |
|     | GSM846533 | indeterminate | malignant | 43 |
|     | GSM846536 | indeterminate | malignant | 50 |
|     | GSM846539 | indeterminate | malignant | 30 |
|     | GSM846540 | indeterminate | malignant | 54 |
|     | GSM846544 | indeterminate | malignant | 44 |
|     | GSM846545 | indeterminate | malignant | 31 |
|     | GSM846547 | indeterminate | malignant | 62 |
|     | GSM846548 | indeterminate | malignant | 36 |
|     | GSM846568 | indeterminate | malignant | 45 |
|     | GSM846570 | indeterminate | malignant | 39 |
|     | GSM846571 | indeterminate | malignant | 33 |
|     | GSM846575 | indeterminate | malignant | 69 |
|     | GSM846576 | indeterminate | malignant | 51 |
|     | GSM846577 | indeterminate | malignant | 53 |
|     | GSM846580 | indeterminate | malignant | 34 |
|     | GSM846581 | indeterminate | malignant | 24 |
|     | GSM846583 | indeterminate | malignant | 49 |
|     | GSM846589 | indeterminate | malignant | 41 |
|     | GSM846590 | indeterminate | malignant | 48 |
|     | GSM846593 | indeterminate | malignant | 46 |
|     | GSM846601 | indeterminate | malignant | 56 |
|     | GSM846606 | indeterminate | malignant | 49 |
|     | GSM846613 | indeterminate | malignant | 39 |
|     | GSM846618 | indeterminate | malignant | 52 |
|     | GSM846623 | indeterminate | malignant | 46 |
|     | GSM846627 | indeterminate | malignant | 46 |
|     | GSM846628 | indeterminate | malignant | 77 |
|     | GSM846645 | indeterminate | malignant | 57 |
|     | GSM846647 | indeterminate | malignant | 52 |
|     | GSM846663 | indeterminate | malignant | 45 |
|     | GSM846668 | indeterminate | malignant | 61 |
|     | GSM846676 | indeterminate | malignant | 42 |
|     | GSM846679 | indeterminate | malignant | 43 |
|     | GSM846683 | indeterminate | malignant | 54 |
|     | GSM846689 | indeterminate | malignant | 53 |
|     | GSM846694 | indeterminate | malignant | 60 |
|     | GSM846695 | indeterminate | malignant | 55 |
|     | GSM846697 | indeterminate | malignant | 73 |
|     | GSM846703 | indeterminate | malignant | 59 |
|     | GSM846706 | indeterminate | malignant | 57 |
|     | GSM846710 | indeterminate | malignant | 66 |
|     | GSM846713 | indeterminate | malignant | 37 |
|     | GSM846717 | indeterminate | malignant | 59 |
|     | GSM846719 | indeterminate | malignant | 46 |

|       |           |               |           |    |
|-------|-----------|---------------|-----------|----|
|       | GSM846721 | indeterminate | malignant | 57 |
|       | GSM846733 | indeterminate | malignant | 34 |
|       | GSM846734 | indeterminate | malignant | 52 |
|       | GSM846735 | indeterminate | malignant | 72 |
|       | GSM846738 | indeterminate | malignant | 59 |
|       | GSM846739 | indeterminate | malignant | 31 |
|       | GSM846745 | indeterminate | malignant | 71 |
|       | GSM846753 | indeterminate | malignant | 66 |
|       | GSM846757 | indeterminate | malignant | 48 |
|       | GSM846762 | indeterminate | malignant | 38 |
|       | GSM846765 | indeterminate | malignant | 31 |
|       | GSM846767 | indeterminate | malignant | 51 |
|       | GSM846768 | indeterminate | malignant | 36 |
|       | GSM846773 | indeterminate | malignant | 58 |
|       | GSM846416 | benign        | benign    | 42 |
|       | GSM846431 | benign        | benign    | 54 |
|       | GSM846446 | benign        | benign    | 66 |
|       | GSM846457 | benign        | benign    | 51 |
|       | GSM846468 | benign        | benign    | 57 |
|       | GSM846469 | benign        | benign    | 67 |
|       | GSM846477 | benign        | benign    | 53 |
|       | GSM846480 | benign        | benign    | 74 |
|       | GSM846482 | benign        | benign    | 48 |
|       | GSM846484 | benign        | benign    | 48 |
|       | GSM846505 | benign        | benign    | 45 |
|       | GSM846506 | benign        | benign    | 65 |
|       | GSM846514 | benign        | benign    | 47 |
|       | GSM846516 | benign        | benign    | 62 |
|       | GSM846518 | benign        | benign    | 51 |
|       | GSM846534 | benign        | benign    | 53 |
|       | GSM846542 | benign        | benign    | 56 |
|       | GSM846546 | benign        | benign    | 48 |
|       | GSM846554 | benign        | benign    | 66 |
| Three | GSM846559 | benign        | benign    | 44 |
|       | GSM846562 | benign        | benign    | 57 |
|       | GSM846572 | benign        | benign    | 57 |
|       | GSM846584 | benign        | benign    | 46 |
|       | GSM846592 | benign        | benign    | 42 |
|       | GSM846612 | benign        | benign    | 52 |
|       | GSM846625 | benign        | benign    | 61 |
|       | GSM846633 | benign        | benign    | 54 |
|       | GSM846638 | benign        | benign    | 61 |
|       | GSM846658 | benign        | benign    | 30 |
|       | GSM846669 | benign        | benign    | 35 |
|       | GSM846672 | benign        | benign    | 60 |
|       | GSM846680 | benign        | benign    | 48 |
|       | GSM846698 | benign        | benign    | 51 |
|       | GSM846701 | benign        | benign    | 55 |
|       | GSM846718 | benign        | benign    | 60 |
|       | GSM846722 | benign        | benign    | 39 |
|       | GSM846728 | benign        | benign    | 77 |

|      |           |           |           |    |
|------|-----------|-----------|-----------|----|
|      | GSM846741 | benign    | benign    | 56 |
|      | GSM846748 | benign    | benign    | 56 |
|      | GSM846755 | benign    | benign    | 57 |
|      | GSM846756 | benign    | benign    | 58 |
|      | GSM846764 | benign    | benign    | 50 |
|      | GSM846766 | benign    | benign    | 60 |
|      | GSM846774 | benign    | benign    | 61 |
|      | GSM846412 | malignant | malignant | 47 |
|      | GSM846419 | malignant | malignant | 29 |
|      | GSM846420 | malignant | malignant | 40 |
|      | GSM846421 | malignant | malignant | 22 |
|      | GSM846426 | malignant | malignant | 43 |
|      | GSM846429 | malignant | malignant | 60 |
|      | GSM846433 | malignant | malignant | 80 |
|      | GSM846437 | malignant | malignant | 33 |
|      | GSM846450 | malignant | malignant | 30 |
|      | GSM846459 | malignant | malignant | 22 |
|      | GSM846461 | malignant | malignant | 35 |
|      | GSM846475 | malignant | malignant | 74 |
|      | GSM846476 | malignant | malignant | 74 |
|      | GSM846483 | malignant | malignant | 49 |
|      | GSM846485 | malignant | malignant | 25 |
|      | GSM846489 | malignant | malignant | 49 |
|      | GSM846491 | malignant | malignant | 56 |
|      | GSM846496 | malignant | malignant | 64 |
|      | GSM846502 | malignant | malignant | 30 |
|      | GSM846522 | malignant | malignant | 34 |
|      | GSM846523 | malignant | malignant | 67 |
|      | GSM846541 | malignant | malignant | 47 |
|      | GSM846549 | malignant | malignant | 43 |
|      | GSM846557 | malignant | malignant | 45 |
|      | GSM846558 | malignant | malignant | 39 |
| Four | GSM846560 | malignant | malignant | 38 |
|      | GSM846561 | malignant | malignant | 49 |
|      | GSM846582 | malignant | malignant | 57 |
|      | GSM846594 | malignant | malignant | 62 |
|      | GSM846598 | malignant | malignant | 53 |
|      | GSM846599 | malignant | malignant | 33 |
|      | GSM846609 | malignant | malignant | 36 |
|      | GSM846640 | malignant | malignant | 26 |
|      | GSM846642 | malignant | malignant | 46 |
|      | GSM846649 | malignant | malignant | 59 |
|      | GSM846654 | malignant | malignant | 71 |
|      | GSM846671 | malignant | malignant | 28 |
|      | GSM846674 | malignant | malignant | 42 |
|      | GSM846675 | malignant | malignant | 31 |
|      | GSM846684 | malignant | malignant | 38 |
|      | GSM846685 | malignant | malignant | 78 |
|      | GSM846696 | malignant | malignant | 43 |
|      | GSM846702 | malignant | malignant | 48 |
|      | GSM846711 | malignant | malignant | 65 |

|           |           |           |    |
|-----------|-----------|-----------|----|
| GSM846725 | malignant | malignant | 35 |
| GSM846737 | malignant | malignant | 49 |
| GSM846740 | malignant | malignant | 48 |
| GSM846742 | malignant | malignant | 60 |
| GSM846750 | malignant | malignant | 64 |
| GSM846758 | malignant | malignant | 67 |
| GSM846759 | malignant | malignant | 50 |
| GSM846760 | malignant | malignant | 38 |
| GSM846763 | malignant | malignant | 48 |
| GSM846770 | malignant | malignant | 50 |
| GSM846776 | malignant | malignant | 70 |
