# Supplementary material for: Identification of potential novel biomarkers to differentiate malignant thyroid nodules with cytological indeterminate
Source: PubMed Central journal article supplement (PMC7066786; doi:10.1186/s12885-020-6676-z), 2020-03-12
Supplement: 12885_2020_6676_MOESM8_ESM.pdf [file 12885_2020_6676_MOESM8_ESM.pdf]

**Supporting Table.2 The pick soft threshold for Module**

|    | <b>Power</b> | <b>SFT.R.sq</b> | <b>slope</b> | <b>truncated.R.sq</b> | <b>mean.k.</b> | <b>median.k.</b> | <b>max.k.</b> |
|----|--------------|-----------------|--------------|-----------------------|----------------|------------------|---------------|
| 1  | 1            | 2.05E-01        | 0.521        | 0.73                  | 42.9           | 4.13E+01         | 71.3          |
| 2  | 2            | 2.95E-01        | -0.397       | 0.767                 | 17.1           | 1.49E+01         | 40.5          |
| 3  | 3            | 6.57E-01        | -0.692       | 0.766                 | 8.67           | 6.59E+00         | 26.8          |
| 4  | 4            | 8.23E-01        | -0.981       | 0.779                 | 5.09           | 3.32E+00         | 19.4          |
| 5  | 5            | 8.59E-01        | -1.03        | 0.831                 | 3.31           | 1.83E+00         | 14.8          |
| 6  | 6            | 7.47E-01        | -1.08        | 0.726                 | 2.32           | 1.08E+00         | 12            |
| 7  | 7            | 8.14E-01        | -1.03        | 0.83                  | 1.71           | 7.05E-01         | 9.96          |
| 8  | 8            | 7.91E-01        | -1.09        | 0.827                 | 1.31           | 4.89E-01         | 8.43          |
| 9  | 9            | 7.45E-01        | -1.06        | 0.782                 | 1.04           | 3.22E-01         | 7.21          |
| 10 | 10           | 7.14E-01        | -1.02        | 0.775                 | 0.841          | 2.26E-01         | 6.24          |
| 11 | 12           | 8.13E-01        | -1.02        | 0.849                 | 0.583          | 1.18E-01         | 4.83          |
| 12 | 14           | 8.41E-01        | -0.968       | 0.862                 | 0.426          | 5.81E-02         | 3.88          |
| 13 | 16           | 8.89E-01        | -0.929       | 0.902                 | 0.322          | 2.76E-02         | 3.17          |
| 14 | 18           | 8.33E-01        | -0.938       | 0.804                 | 0.25           | 1.34E-02         | 2.62          |
| 15 | 20           | 1.73E-01        | -1.63        | -0.0414               | 0.198          | 7.00E-03         | 2.18          |
