# Supplementary material for: Identification of potential novel biomarkers to differentiate malignant thyroid nodules with cytological indeterminate
Source: PubMed Central journal article supplement (PMC7066786; doi:10.1186/s12885-020-6676-z), 2020-03-12
Supplement: 12885_2020_6676_MOESM9_ESM.pdf [file 12885_2020_6676_MOESM9_ESM.pdf]

**Supporting Table 3. List of the 29 Genes in the grey module.**

| <b>ProbeID</b> | <b>GeneSymbol</b> | <b>mRNAAccession</b> | <b>GS</b> | <b>p.GS.histology</b> | <b>MM.grey</b> | <b>p.MM.grey</b> |
|----------------|-------------------|----------------------|-----------|-----------------------|----------------|------------------|
| 3428225        | NR1H4             | NM_005123            | -0.23     | 1.26E-04              | 0.65           | 1.88E-33         |
| 2585400        | SCN9A             | NM_002977            | -0.22     | 3.32E-04              | 0.16           | 9.30E-03         |
| 2430163        | VTCN1             | NM_024626            | 0.22      | 3.72E-04              | 0.17           | 7.27E-03         |
| 3484895        | KL                | NM_004795            | 0.21      | 4.85E-04              | 0.16           | 8.55E-03         |
| 2739308        | EGF               | NM_001963            | -0.21     | 6.20E-04              | 0.36           | 1.51E-09         |
| 2981874        | DYNLT1            | NM_006519            | -0.19     | 1.82E-03              | 0.13           | 2.86E-02         |
| 3811086        | PIGN              | NM_176787            | -0.19     | 2.31E-03              | -0.49          | 1.23E-17         |
| 3006572        | AUTS2             | NM_015570            | 0.18      | 3.92E-03              | 0.34           | 2.55E-08         |
| 3142381        | FABP4             | NM_001442            | -0.16     | 9.41E-03              | -0.09          | 1.53E-01         |
| 3393479        | FXYP6             | NM_001164836         | -0.15     | 1.22E-02              | -0.01          | 8.52E-01         |
| 3159754        | DMRT2             | NM_006557            | -0.12     | 5.19E-02              | 0.41           | 8.29E-12         |
| 3343832        | TYR               | NM_000372            | -0.11     | 6.73E-02              | 0.75           | 4.13E-48         |
| 3264997        | C10orf81          | NM_001193434         | -0.11     | 6.84E-02              | 0.68           | 7.57E-37         |
| 2894790        | SYCP2L            | NM_001040274         | -0.09     | 1.27E-01              | 0.55           | 1.26E-22         |
| 2372812        | RGS13             | NM_002927            | 0.09      | 1.37E-01              | -0.05          | 4.51E-01         |
| 3363686        | KIDINS220         | NM_020738            | -0.08     | 2.05E-01              | 0.25           | 3.18E-05         |
| 2730303        | C4orf7            | NM_152997            | 0.07      | 2.30E-01              | -0.06          | 3.13E-01         |
| 2490351        | CTNNA2            | NM_004389            | -0.07     | 2.43E-01              | 0.86           | 1.67E-79         |
| 2732508        | CXCL13            | NM_006419            | 0.06      | 3.57E-01              | -0.15          | 1.48E-02         |
| 3364127        | CALCA             | NM_001741            | -0.06     | 3.59E-01              | 0.47           | 7.87E-16         |
| 2479698        | SLC3A1            | NM_000341            | -0.05     | 3.91E-01              | -0.08          | 1.78E-01         |
| 3242353        | CREM              | NM_183013            | -0.05     | 4.45E-01              | -0.22          | 4.32E-04         |
| 3039830        | AGR3              | NM_176813            | 0.05      | 4.53E-01              | 0.32           | 1.53E-07         |
| 3811949        | CDH19             | NM_021153            | -0.04     | 5.14E-01              | 0.82           | 2.53E-65         |
| 2941690        | GCM2              | NM_004752            | -0.04     | 5.51E-01              | 0.72           | 1.03E-43         |
| 3834341        | CEACAM5           | NM_004363            | -0.04     | 5.69E-01              | 0.33           | 3.43E-08         |
| 3214845        | ASPN              | NM_017680            | 0.03      | 6.40E-01              | 0.09           | 1.34E-01         |
| 3457336        | SILV              | NM_006928            | 0.02      | 7.53E-01              | 0.11           | 8.78E-02         |
| 2923928        | FABP7             | NM_001446            | -0.01     | 8.42E-01              | 0.51           | 1.70E-18         |
