# Supplementary material for: Identification of potential novel biomarkers to differentiate malignant thyroid nodules with cytological indeterminate
Source: PubMed Central journal article supplement (PMC7066786; doi:10.1186/s12885-020-6676-z), 2020-03-12
Supplement: 12885_2020_6676_MOESM10_ESM.pdf [file 12885_2020_6676_MOESM10_ESM.pdf]

**Supporting Table.4 List of the 24 Genes in the blue module.**

| ProbelD | GeneSymbol | mRNAAccession | GS      | p.GS.histology | MM.blue | p.MM.blue |
|---------|------------|---------------|---------|----------------|---------|-----------|
| 2708855 | LIPH       | NM_139248     | 0.5473  | 5.94E-22       | 0.9091  | 3.15E-101 |
| 2884845 | GABRB2     | NM_021911     | 0.5261  | 4.02E-20       | 0.8046  | 5.11E-61  |
| 3329343 | MDK        | NM_001012334  | 0.5186  | 1.66E-19       | 0.6857  | 7.26E-38  |
| 2657808 | CLDN16     | NM_006580     | 0.5088  | 1.01E-18       | 0.8588  | 8.64E-78  |
| 2710599 | CLDN1      | NM_021101     | 0.4566  | 5.95E-15       | 0.8675  | 3.91E-81  |
| 2442008 | RXRG       | NM_006917     | 0.4530  | 1.04E-14       | 0.8209  | 1.84E-65  |
| 3757108 | KRT19      | NM_002276     | 0.4359  | 1.27E-13       | 0.7275  | 1.35E-44  |
| 4012178 | CITED1     | NM_001144885  | 0.4347  | 1.50E-13       | 0.8393  | 4.94E-71  |
| 2685304 | PROS1      | NM_000313     | 0.4295  | 3.15E-13       | 0.8289  | 8.28E-68  |
| 3494629 | SCEL       | NM_144777     | 0.4073  | 6.27E-12       | 0.7385  | 1.43E-46  |
| 2721959 | SLC34A2    | NM_001177999  | 0.4041  | 9.42E-12       | 0.7620  | 3.56E-51  |
| 2562529 | ST3GAL5    | NM_003896     | 0.3967  | 2.40E-11       | 0.8109  | 1.08E-62  |
| 3338192 | CCND1      | NM_053056     | 0.3864  | 8.61E-11       | 0.8098  | 2.26E-62  |
| 2396750 | FBXO2      | NM_012168     | 0.3740  | 3.71E-10       | 0.5680  | 7.16E-24  |
| 4020655 | ODZ1       | NM_001163278  | 0.3604  | 1.74E-09       | 0.7082  | 2.42E-41  |
| 2834282 | STK32A     | NM_001112724  | 0.3457  | 8.47E-09       | 0.7486  | 1.70E-48  |
| 2598261 | FN1        | NM_212482     | 0.3252  | 6.82E-08       | 0.5546  | 1.31E-22  |
| 3212008 | FRMD3      | NM_174938     | 0.3208  | 1.05E-07       | 0.7488  | 1.59E-48  |
| 2378068 | GOS2       | NM_015714     | 0.2965  | 9.78E-07       | 0.3430  | 1.13E-08  |
| 3365136 | SERGEF     | NM_012139     | 0.2903  | 1.67E-06       | 0.6219  | 1.54E-29  |
| 3259367 | CC2D2B     | NM_001159747  | 0.2628  | 1.57E-05       | 0.5396  | 2.84E-21  |
| 2373336 | CFH        | NM_000186     | 0.2590  | 2.11E-05       | 0.4242  | 6.52E-13  |
| 3341497 | NDUFC2     | NM_004549     | 0.2461  | 5.49E-05       | 0.5640  | 1.74E-23  |
| 2880051 | PPP2R2B    | NM_181674     | -0.2188 | 3.51E-04       | -0.5678 | 7.53E-24  |
