# Supplementary material for: Identification of potential novel biomarkers to differentiate malignant thyroid nodules with cytological indeterminate
Source: PubMed Central journal article supplement (PMC7066786; doi:10.1186/s12885-020-6676-z), 2020-03-12
Supplement: 12885_2020_6676_MOESM11_ESM.pdf [file 12885_2020_6676_MOESM11_ESM.pdf]

**Supporting Table. 5 Copy-number Alterations of Significant Genes .**

| <b>Gene Symbol</b> | <b>OQL Line</b>                 | <b>Num Samples Altered</b> | <b>Percent Samples Altered</b> |
|--------------------|---------------------------------|----------------------------|--------------------------------|
| SCEL               | SCEL: AMP HOMDEL MUT FUSION;    | 8                          | 0.009                          |
| CFH                | CFH: AMP HOMDEL MUT FUSION;     | 7                          | 0.008                          |
| G0S2               | G0S2: AMP HOMDEL MUT FUSION;    | 7                          | 0.008                          |
| FN1                | FN1: AMP HOMDEL MUT FUSION;     | 4                          | 0.005                          |
| PROS1              | PROS1: AMP HOMDEL MUT FUSION;   | 4                          | 0.005                          |
| TENM1              | TENM1: AMP HOMDEL MUT FUSION;   | 3                          | 0.003                          |
| RXRG               | RXRG: AMP HOMDEL MUT FUSION;    | 3                          | 0.003                          |
| STK32A             | STK32A: AMP HOMDEL MUT FUSION;  | 3                          | 0.003                          |
| CC2D2B             | CC2D2B: AMP HOMDEL MUT FUSION;  | 2                          | 0.002                          |
| GABRB2             | GABRB2: AMP HOMDEL MUT FUSION;  | 2                          | 0.002                          |
| KRT19              | KRT19: AMP HOMDEL MUT FUSION;   | 2                          | 0.002                          |
| PPP2R2B            | PPP2R2B: AMP HOMDEL MUT FUSION; | 2                          | 0.002                          |
| SERGEF             | SERGEF: AMP HOMDEL MUT FUSION;  | 2                          | 0.002                          |
| SLC34A2            | SLC34A2: AMP HOMDEL MUT FUSION; | 2                          | 0.002                          |
| CITED1             | CITED1: AMP HOMDEL MUT FUSION;  | 1                          | 0.001                          |
