# Supplementary material for: Identification of potential novel biomarkers to differentiate malignant thyroid nodules with cytological indeterminate
Source: PubMed Central journal article supplement (PMC7066786; doi:10.1186/s12885-020-6676-z), 2020-03-12
Supplement: 12885_2020_6676_MOESM12_ESM.pdf [file 12885_2020_6676_MOESM12_ESM.pdf]

**Supporting Table.6 The mutual exclusivity alterations of significant Gene pairs**

| Gene A         | Gene B        | Neither | A Not B | B Not A | Both | Log Odds Ratio | p-Value | Adjusted p-Value | Tendency      |
|----------------|---------------|---------|---------|---------|------|----------------|---------|------------------|---------------|
| <b>CFH</b>     | <b>G0S2</b>   | 908     | 0       | 0       | 7    | >3             | <0.001  | <b>&lt;0.001</b> | Co-occurrence |
| <b>CFH</b>     | <b>RXRG</b>   | 908     | 4       | 0       | 3    | >3             | <0.001  | <b>&lt;0.001</b> | Co-occurrence |
| <b>G0S2</b>    | <b>RXRG</b>   | 908     | 4       | 0       | 3    | >3             | <0.001  | <b>&lt;0.001</b> | Co-occurrence |
| <b>PPP2R2B</b> | <b>STK32A</b> | 912     | 0       | 1       | 2    | >3             | <0.001  | <b>0.002</b>     | Co-occurrence |
| <b>PROS1</b>   | <b>SCEL</b>   | 905     | 2       | 6       | 2    | >3             | <0.001  | 0.11             | Co-occurrence |
| <b>CITED1</b>  | <b>TENM1</b>  | 912     | 0       | 2       | 1    | >3             | 0.003   | 0.905            | Co-occurrence |
